# Supplementary material for: Timing of Renal Replacement Therapy Initiation in Patients with Septic Acute Kidney Injury; A Systematic Review and Meta-Analysis
Source: Research Square preprint supplement (doi:10.21203/rs.3.rs-966692/v1), 2021-10-29
Supplement: Supplementary file 1 [file dce48a0144ba13f82bf1da32.docx]

**Supplemental table 2. Risk of bias assessment of randomized controlled trials.**

| **First author of each study** | **Random**  **sequence generation?** | **Allocation concealment?** | **Blinding of participants and personnel?** | **Blinding of outcome assessment?** | **Incomplete outcome data addressed?** | **Free of selective reporting?** | **Free of other bias (no funding)?** |
| --- | --- | --- | --- | --- | --- | --- | --- |
| Barbar | Y | U | U | Y | Y | Y | Y |

Abbreviations: *Y* Yes (i.e. low risk of bias), *N* No (i.e. high risk of bias), *U* Unclear (i.e. insufficient information to permit judgement of ‘low risk’ or ‘high risk’)
